# Supplementary material for: Increasing the value of digital phenotyping through reducing missingness: a retrospective review and analysis of prior studies
Source: PubMed Central journal article supplement — BMJ Ment Health. 2023 May 17;26(1):e300718. doi: 10.1136/bmjment-2023-300718 (PMC10231441; doi:10.1136/bmjment-2023-300718), 2023-05-17
Supplement: bmjment-2023-300718supp009.pdf [file bmjment-2023-300718supp009.pdf]

**Table D.4** Race / ethnicity information from all studies.

| <b>Study</b>            | <b>Total*</b> | <b>American Indian / Alaskan Native</b> | <b>Asian</b> | <b>African American</b> | <b>Latinx **</b> | <b>Native Hawaiian / Pacific Islander</b> | <b>White</b> | <b>Other</b> |
|-------------------------|---------------|-----------------------------------------|--------------|-------------------------|------------------|-------------------------------------------|--------------|--------------|
| Study 1 (schizophrenia) | 92            | 1                                       | 2            | 17                      | 0                | 0                                         | 40           | 14           |
| Study 2 (college)       | 644           | 2                                       | 133          | 52                      | 117              | 6                                         | 298          | 34           |
| Study 3 (therapy)       | 92            | 0                                       | 2            | 0                       | 8                | 1                                         | 65           | 9            |
| Study 4 (anxiety)       | 220           | 1                                       | 9            | 9                       | 10               | 0                                         | 145          | 8            |
| Study 5 (schizophrenia) | 22            | 0                                       | 0            | 4                       | 1                | 0                                         | 9            | 1            |
| Study 6 (schizophrenia) | 12            | 0                                       | 0            | 1                       | 1                | 0                                         | 9            | 1            |
| Study 7 (college)       | 96            | 0                                       | 30           | 5                       | 6                | 1                                         | 53           | 1            |
| Total                   | 1178          | 4                                       | 176          | 88                      | 143              | 8                                         | 619          | 68           |

\*Some participants chose not to report demographic information which accounts for the discrepancy in counts.

\*\*Study 3, 5 and 6 asked for race and Latinx / Non-Latinx separately. In these studies, participants were included in Latinx only if they marked race as “other/multiracial” and Latinx.
