# Supplementary figures and images for: Increasing the value of digital phenotyping through reducing missingness: a retrospective review and analysis of prior studies
Source: PubMed Central journal article supplement — BMJ Ment Health. 2023 May 17;26(1):e300718. doi: 10.1136/bmjment-2023-300718 (PMC10231441; doi:10.1136/bmjment-2023-300718), 2023-05-17

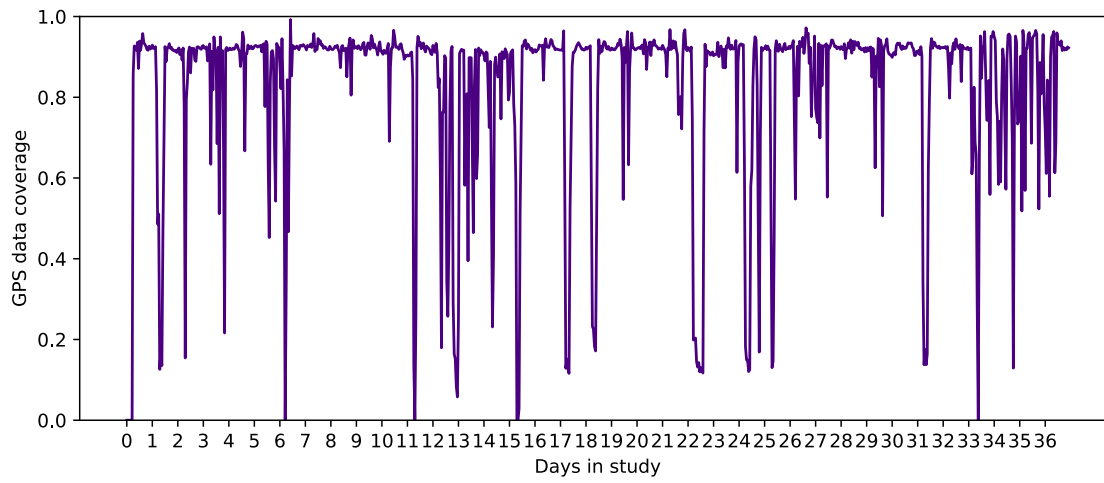

Supplement: bmjment-2023-300718supp001.pdf [file bmjment-2023-300718supp001.pdf]

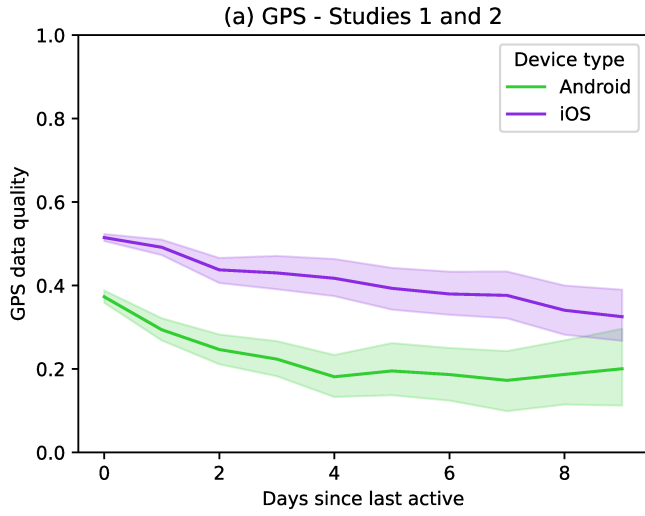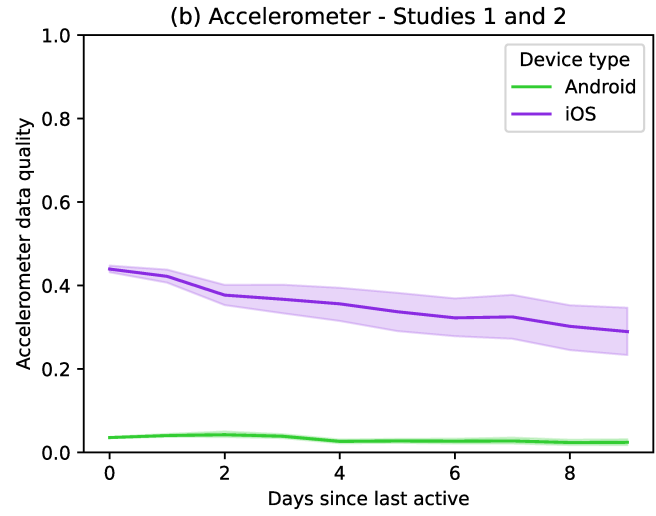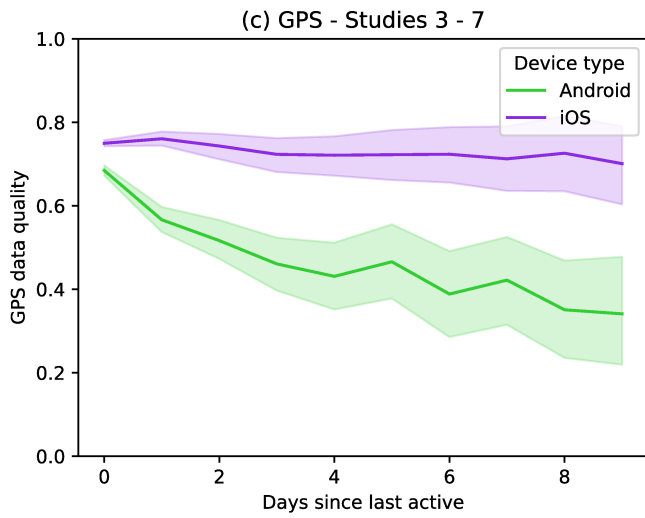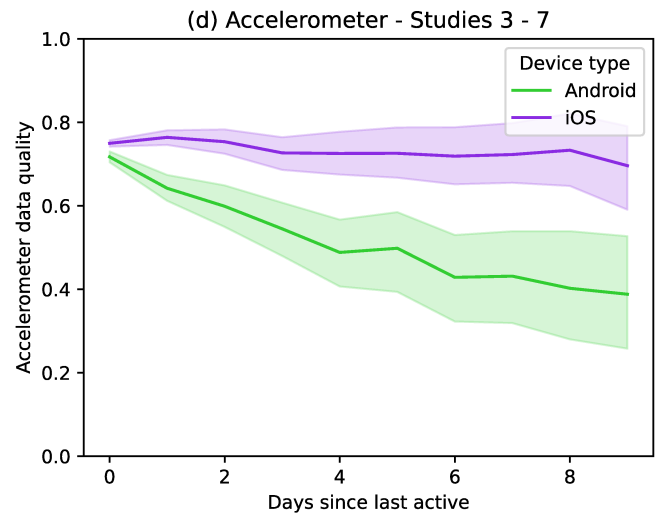

Supplement: bmjment-2023-300718supp002.pdf [file bmjment-2023-300718supp002.pdf]

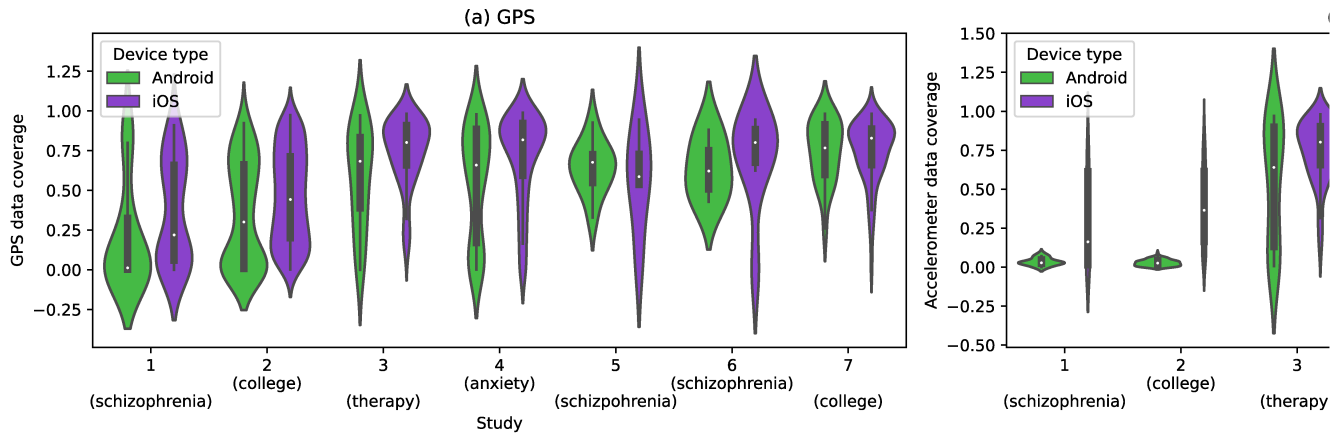

Supplement: bmjment-2023-300718supp003.pdf [file bmjment-2023-300718supp003.pdf]

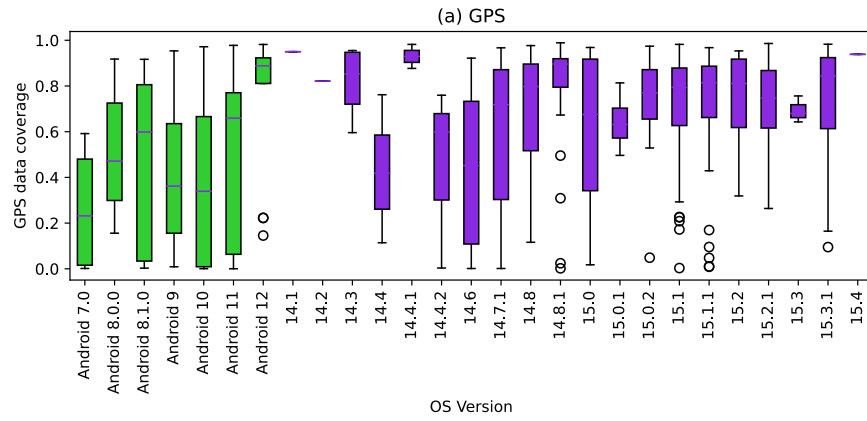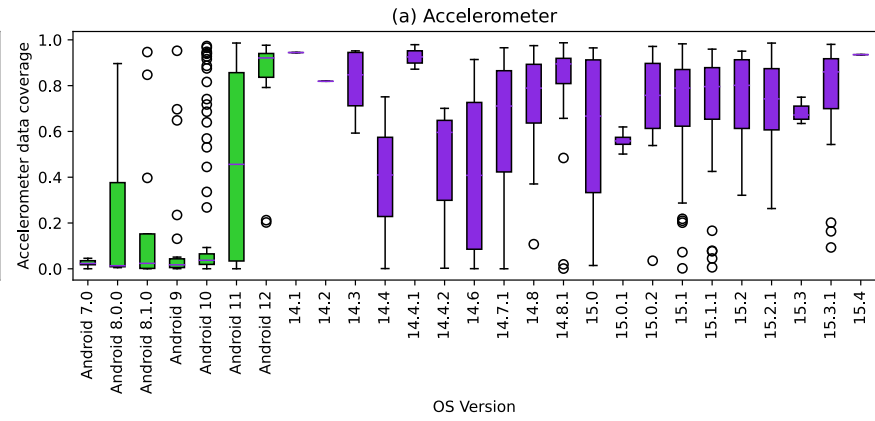

Supplement: bmjment-2023-300718supp004.pdf [file bmjment-2023-300718supp004.pdf]

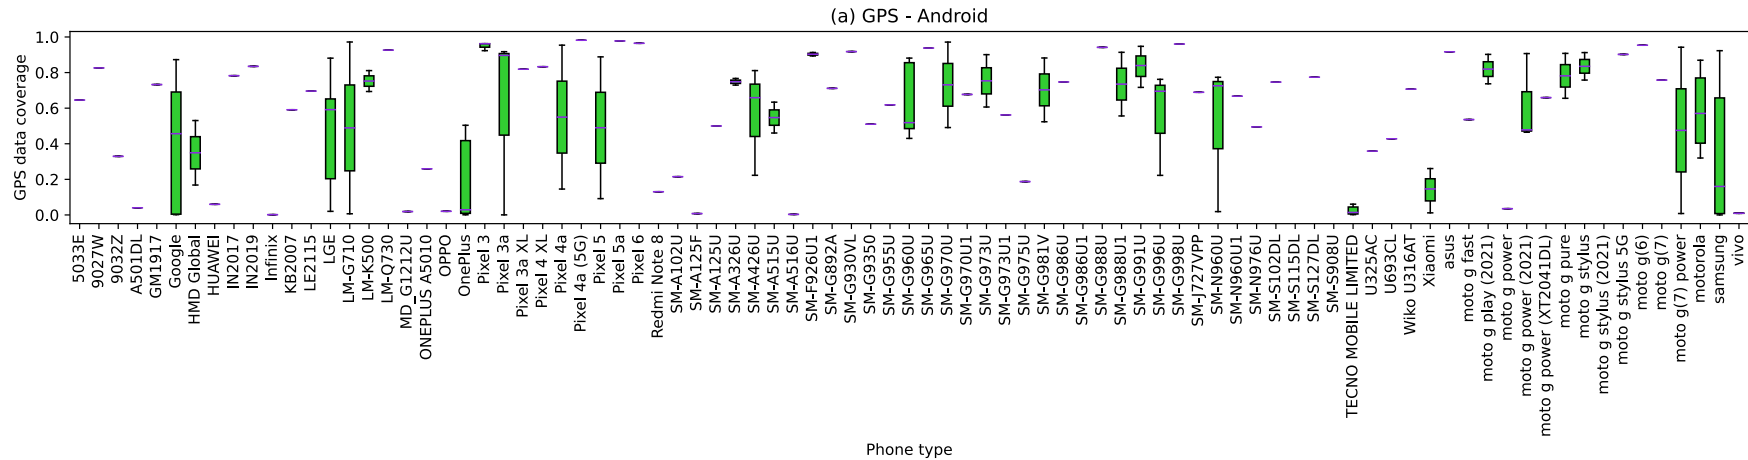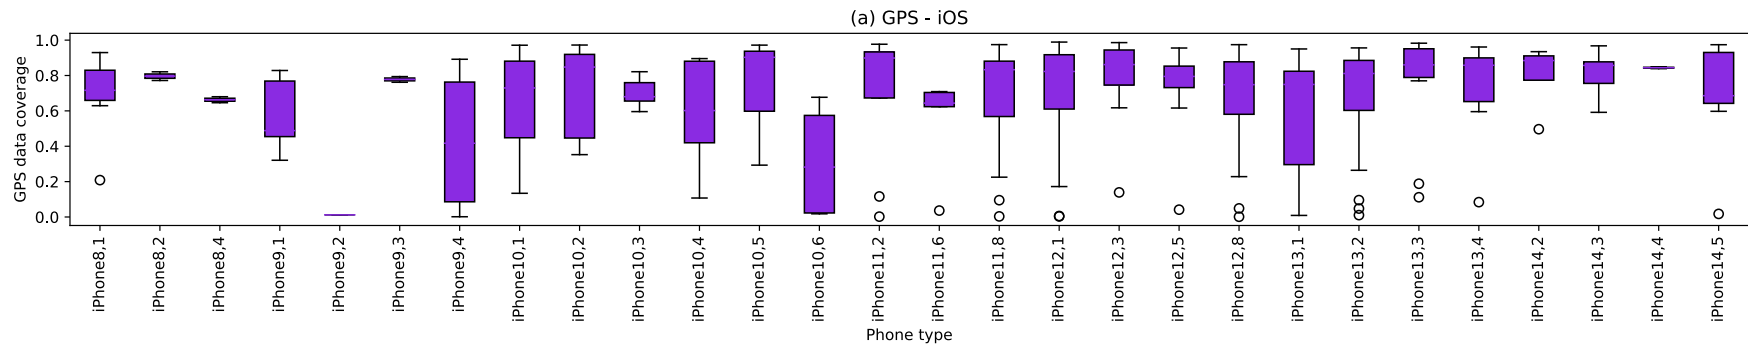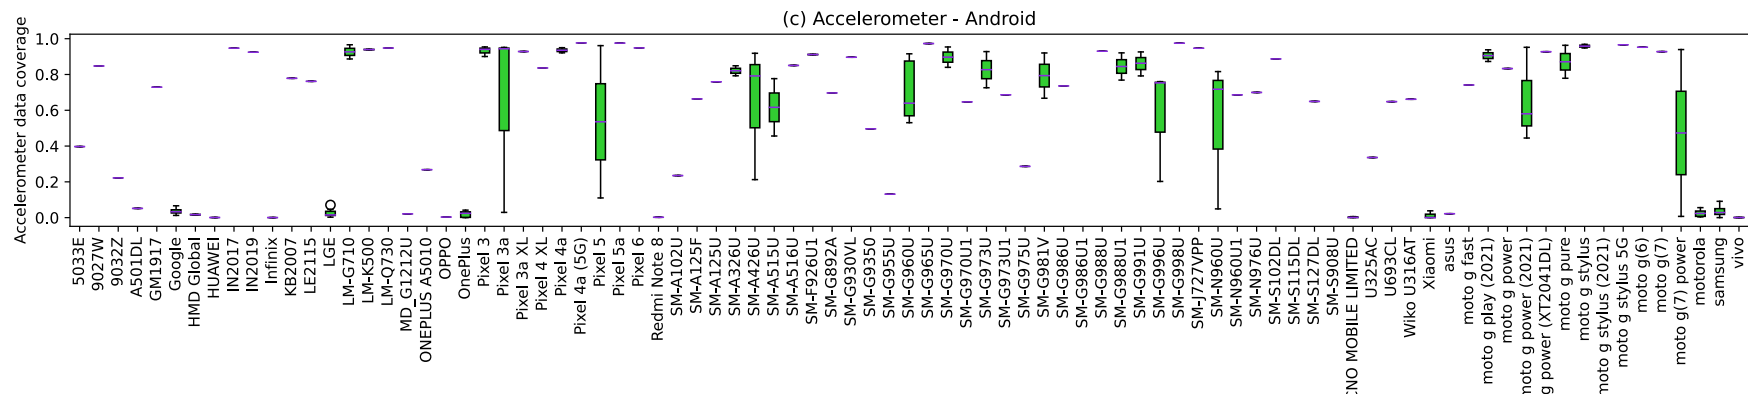

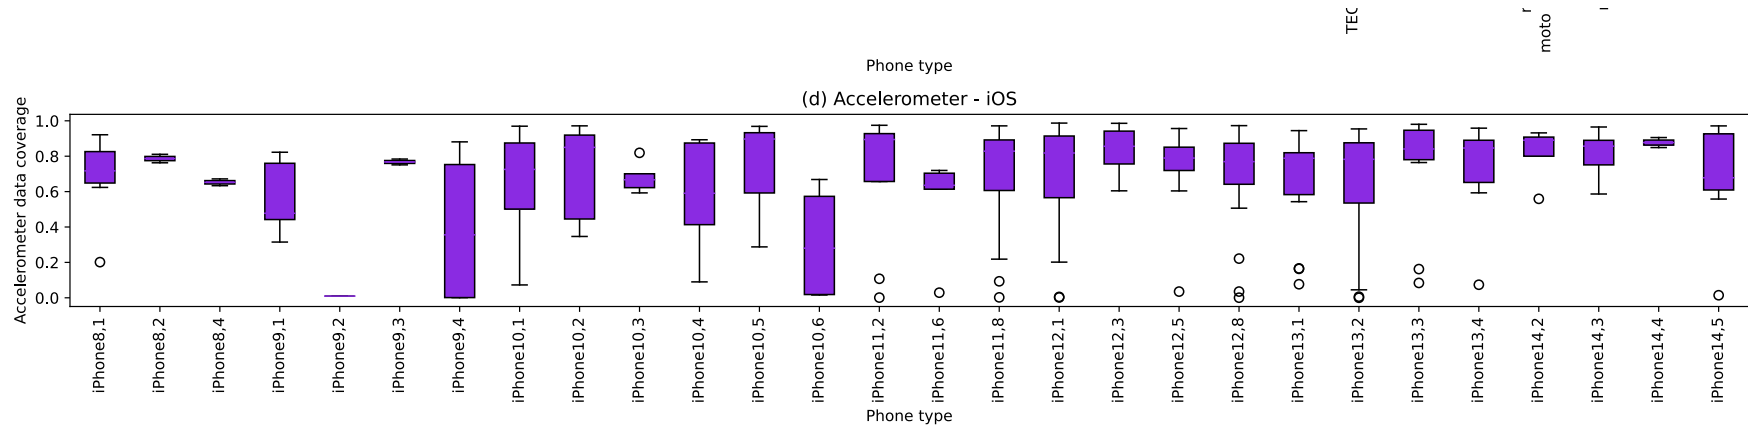

Supplement: bmjment-2023-300718supp005.pdf [file bmjment-2023-300718supp005.pdf]

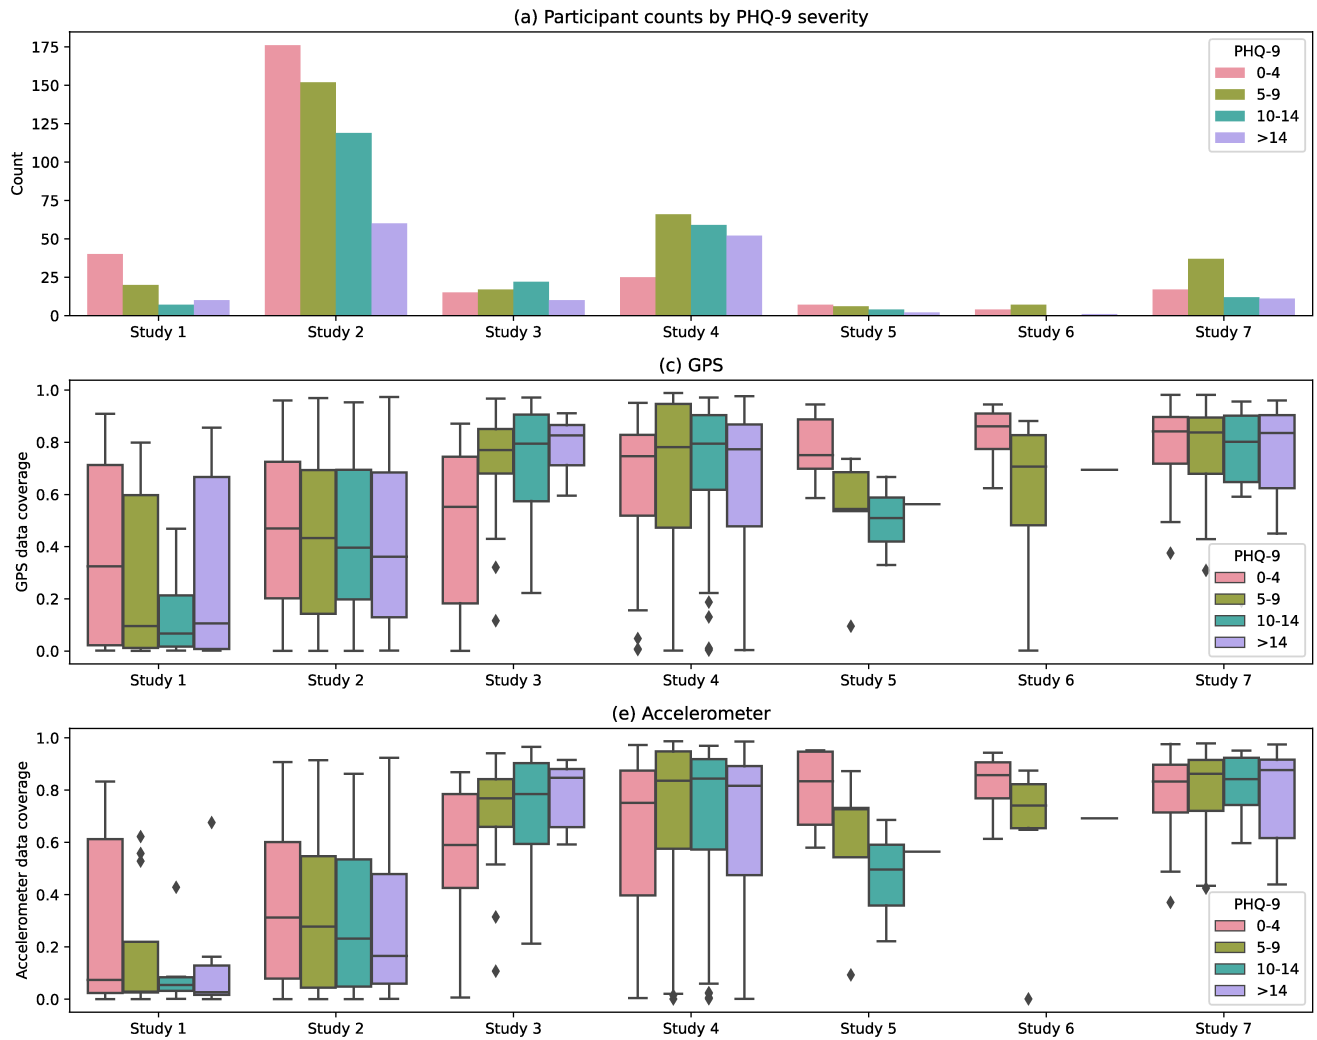

Supplement: bmjment-2023-300718supp006.pdf [file bmjment-2023-300718supp006.pdf]

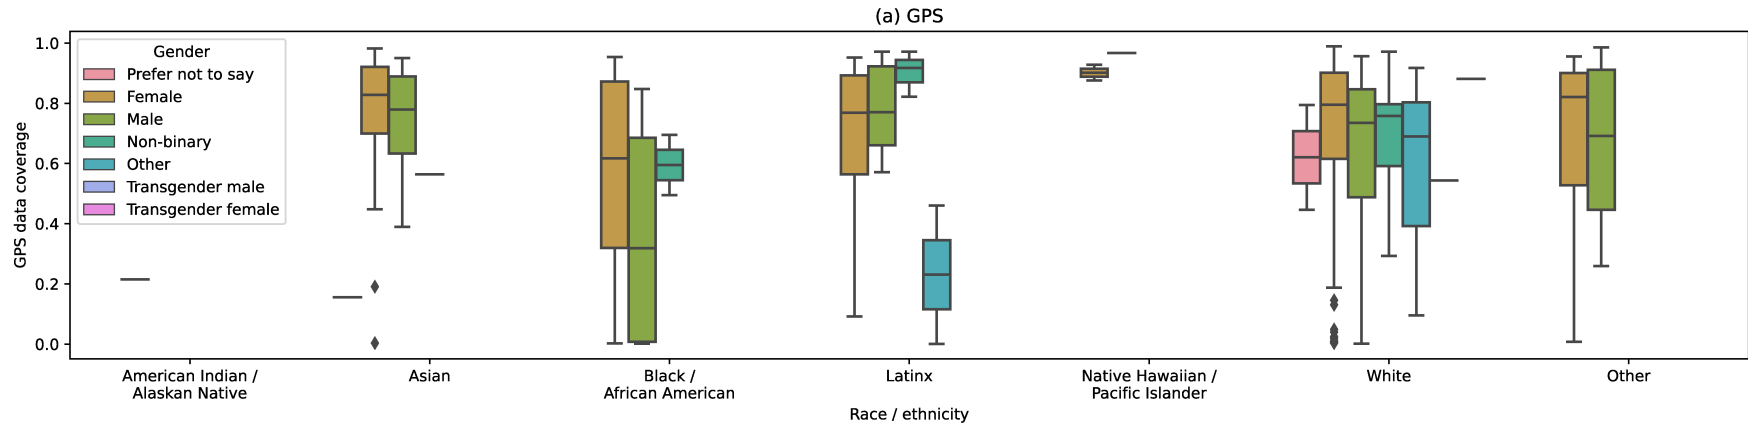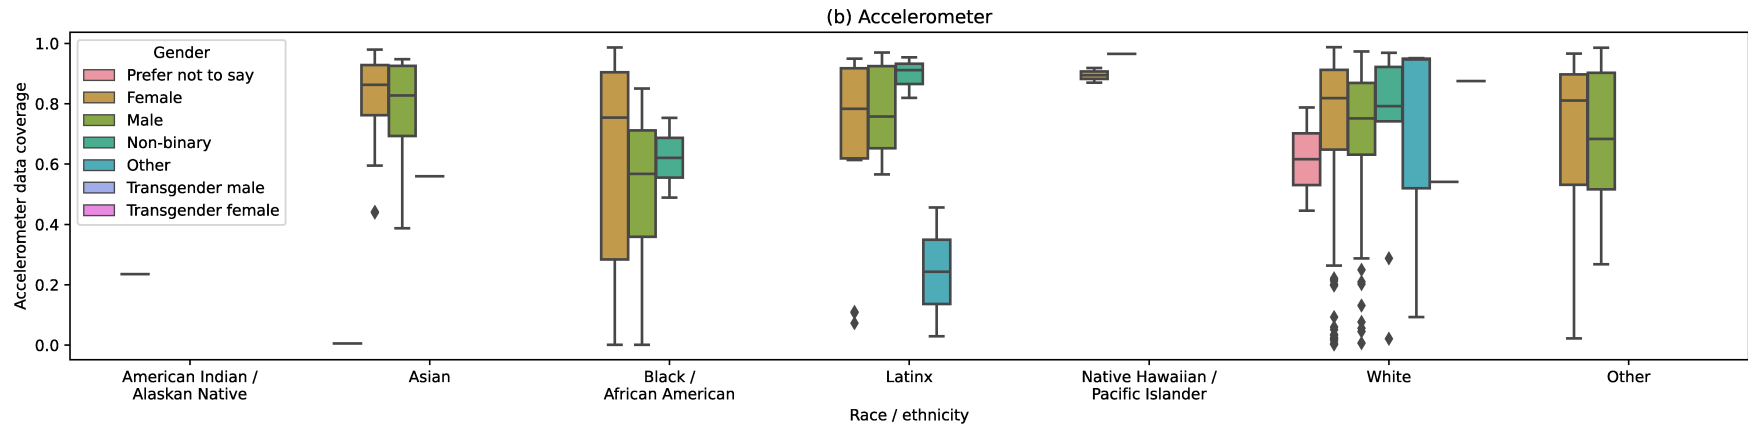

Supplement: bmjment-2023-300718supp007.pdf [file bmjment-2023-300718supp007.pdf]

(a) GPS

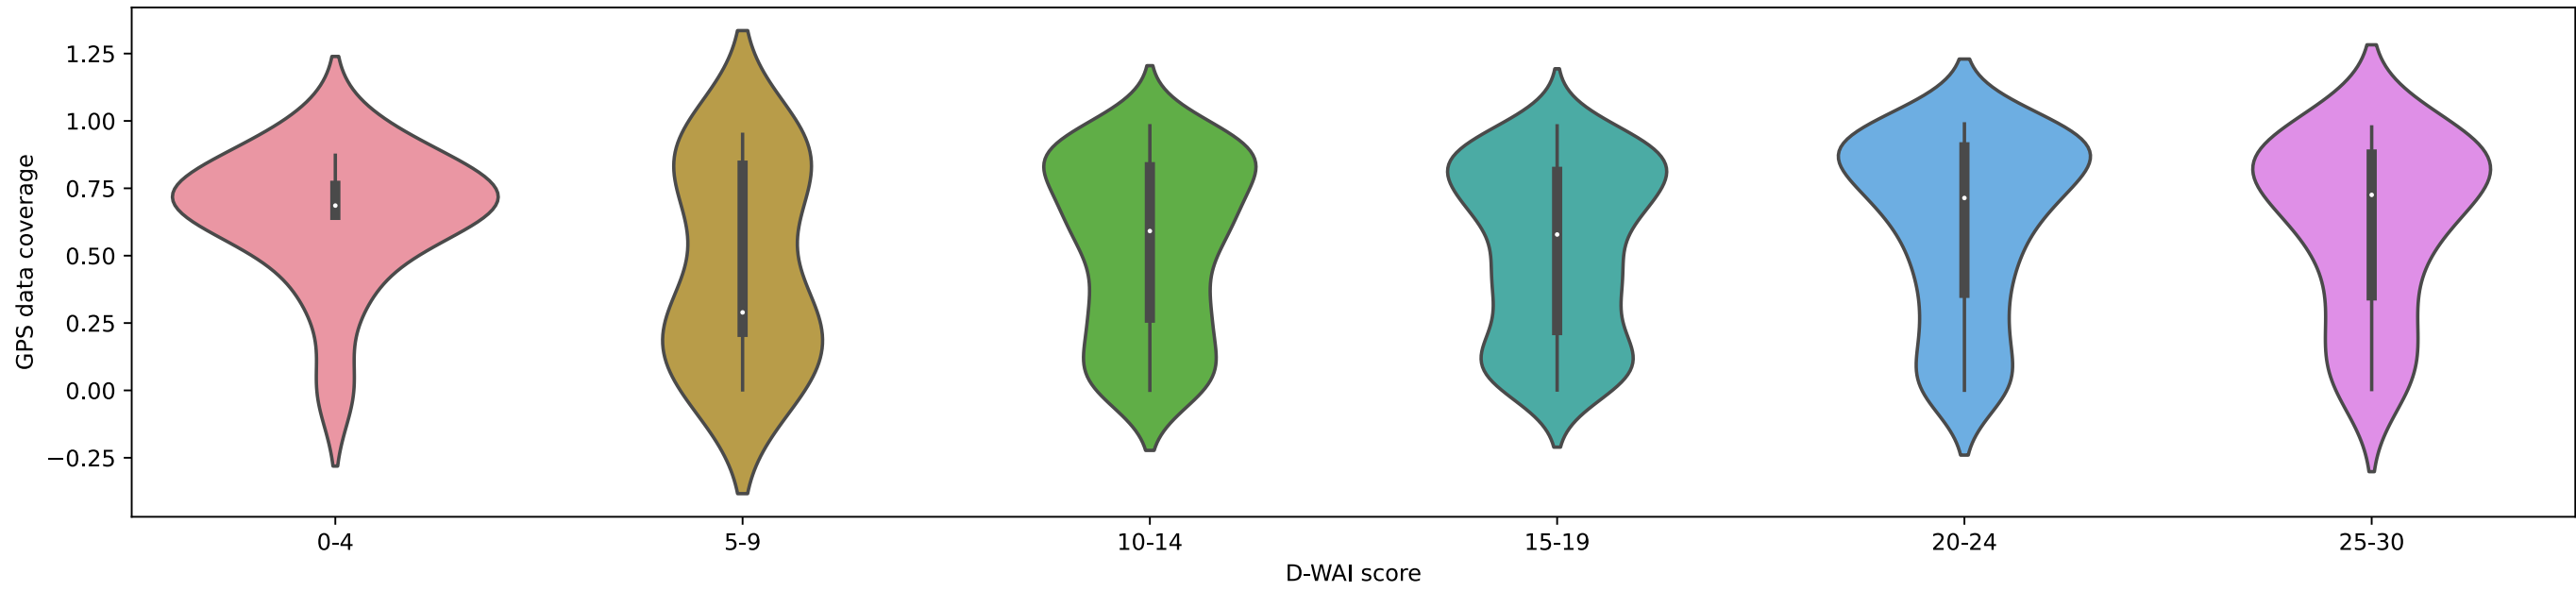

(b) Accelerometer

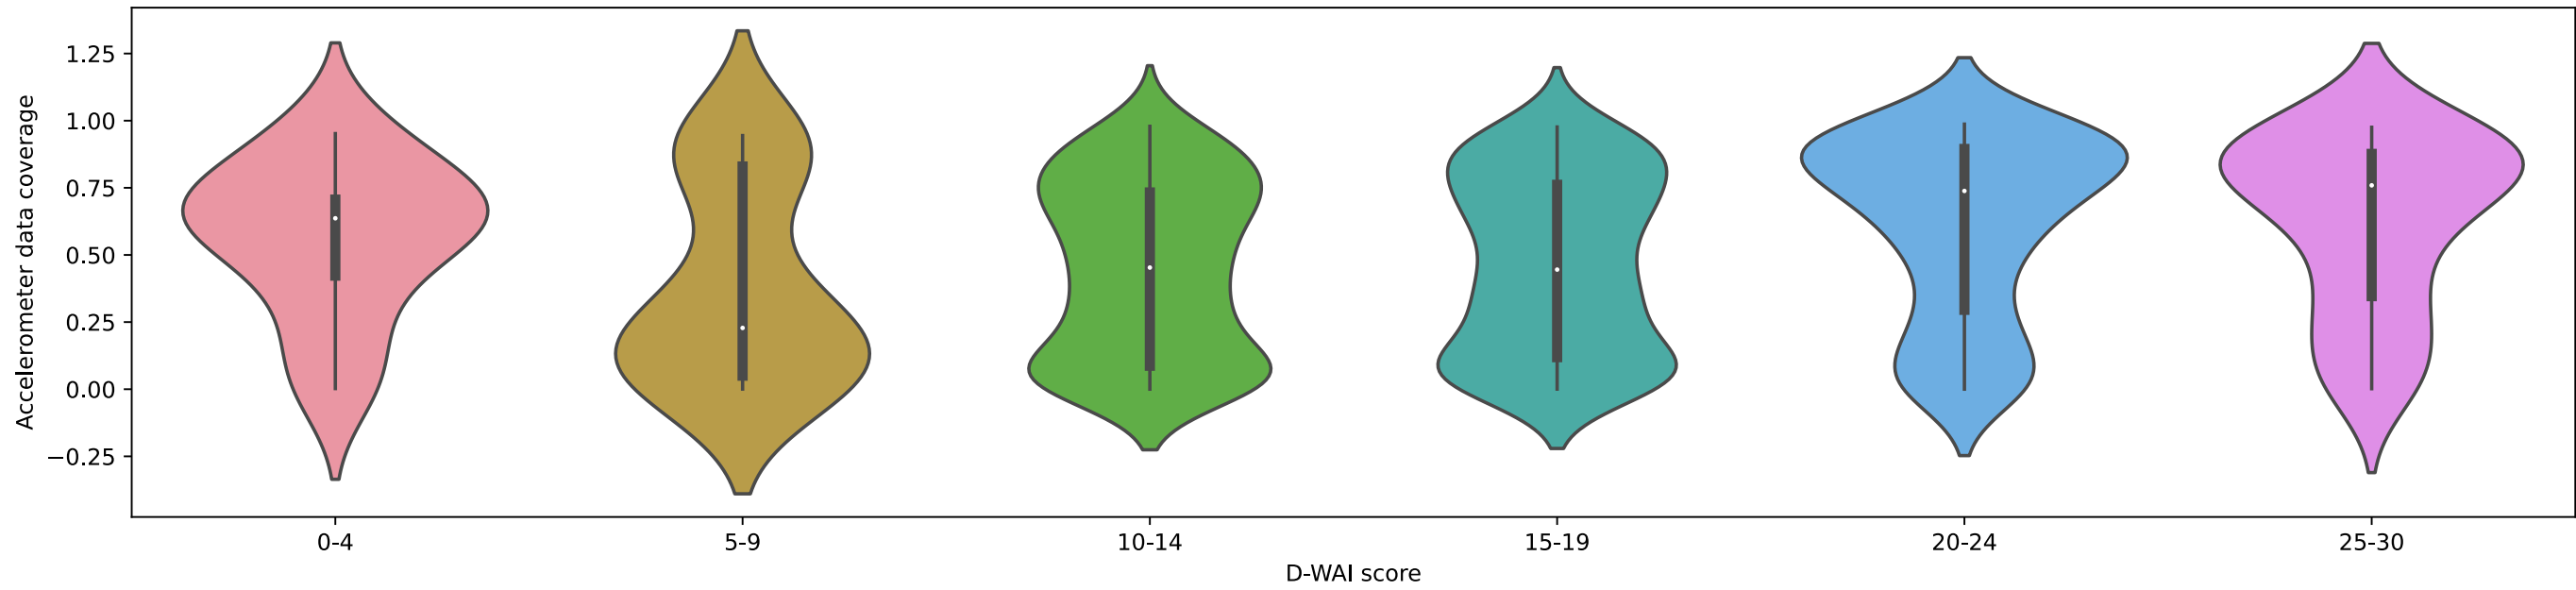

Supplement: bmjment-2023-300718supp010.pdf [file bmjment-2023-300718supp010.pdf]
